# Supplementary material for: The effect of osteopathic medicine on pain in musicians with nonspecific chronic neck pain: a randomized controlled trial
Source: PubMed Central journal article supplement (PMC7734566; doi:10.1177/1759720x20979853), 2020-12-10
Supplement: sj-pdf-1-tab-10.1177_1759720X20979853.pdf [file sj-pdf-1-tab-10.1177_1759720X20979853.pdf]

**Please indicate your average neck pain for the last week:**

*Please put a cross on the scale*

no pain at all

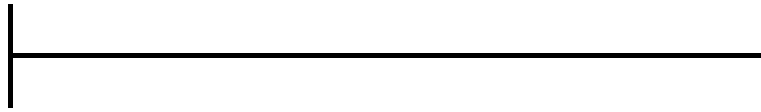

worst imaginable pain

**Supplement 1:** Figure visual analog scale (VAS) pain, English translation
