# Supplementary material for: The effect of osteopathic medicine on pain in musicians with nonspecific chronic neck pain: a randomized controlled trial
Source: PubMed Central journal article supplement (PMC7734566; doi:10.1177/1759720x20979853), 2020-12-10
Supplement: sj-pdf-4-tab-10.1177_1759720X20979853.pdf [file sj-pdf-4-tab-10.1177_1759720X20979853.pdf]

**Table 4:** Complaints due to musculoskeletal pain and effectiveness assessment of osteopathic medicine treatment over time

|                                                                                                      |                        | n* | OM group<br>n = 28<br>n (%) | Control group<br>n = 34<br>n (%) |
|------------------------------------------------------------------------------------------------------|------------------------|----|-----------------------------|----------------------------------|
| <b>Complaints due to musculoskeletal pain rated by patient, changes within the last 6 weeks</b>      |                        |    |                             |                                  |
| After 6 weeks                                                                                        | Completely disappeared | 61 | 0                           | 0                                |
|                                                                                                      | Clearly reduced        |    | 12 (42.9)                   | 4 (12.1)                         |
|                                                                                                      | Slightly reduced       |    | 11 (39.3)                   | 6 (18.2)                         |
|                                                                                                      | Unchanged              |    | 4 (14.3)                    | 20 (60.6)                        |
|                                                                                                      | Worsened               |    | 1 (3.6)                     | 3 (9.1)                          |
| After 12 weeks                                                                                       | Completely disappeared | 61 | 4 (14.3)                    | 0                                |
|                                                                                                      | Clearly reduced        |    | 17 (60.7)                   | 3 (9.1)                          |
|                                                                                                      | Slightly reduced       |    | 6 (21.4)                    | 9 (27.3)                         |
|                                                                                                      | Unchanged              |    | 0                           | 17 (51.5)                        |
|                                                                                                      | Worsened               |    | 1 (3.6)                     | 4 (12.1)                         |
| After 26 weeks<br>(control group receiving OM<br>intervention)***                                    | Completely disappeared | 58 | 2 (7.7)                     | 0                                |
|                                                                                                      | Clearly reduced        |    | 9 (34.6)                    | 8 (25.0)                         |
|                                                                                                      | Slightly reduced       |    | 7 (26.9)                    | 13 (40.6)                        |
|                                                                                                      | Unchanged              |    | 4 (15.4)                    | 4 (15.4)                         |
|                                                                                                      | Worsened               |    | 4 (15.4)                    | 3 (9.4)                          |
| After 52 weeks<br>(control group receiving OM<br>intervention)***                                    | Completely disappeared | 57 | 1 (3.7)                     | 1 (3.3)                          |
|                                                                                                      | Clearly reduced        |    | 11 (40.7)                   | 6 (20.0)                         |
|                                                                                                      | Slightly reduced       |    | 5 (18.5)                    | 10 (33.3)                        |
|                                                                                                      | Unchanged              |    | 4 (15.4)                    | 4 (15.4)                         |
|                                                                                                      | Worsened               |    | 4 (15.4)                    | 3 (9.4)                          |
| <b>Effectiveness assessment of OM treatment rated by patient, with reference to the last 6 weeks</b> |                        |    |                             |                                  |
| After 6 weeks                                                                                        | Highly effective       | 28 | 9 (32.1)                    | **                               |
|                                                                                                      | Effective              |    | 14 (40.0)                   | **                               |
|                                                                                                      | Slightly effective     |    | 5 (17.9)                    | **                               |
|                                                                                                      | Not effective          |    | 0                           | **                               |
| After 12 weeks                                                                                       | Highly effective       | 28 | 13 (53.6)                   | **                               |
|                                                                                                      | Effective              |    | 11 (39.3)                   | **                               |
|                                                                                                      | Slightly effective     |    | 2 (7.1)                     | **                               |
|                                                                                                      | Not effective          |    | 0                           | **                               |
| After 26 weeks<br>(control group receiving OM<br>intervention)***                                    | Highly effective       | 46 | 14 (53.9)                   | 4 (20.0)                         |
|                                                                                                      | Effective              |    | 8 (30.8)                    | 12 (60.0)                        |
|                                                                                                      | Slightly effective     |    | 4 (15.4)                    | 4 (20.0)                         |
|                                                                                                      | Not effective          |    | 0                           | 0                                |
| After 52 weeks<br>(control group receiving OM<br>intervention)***                                    | Highly effective       | 41 | 15 (55.6)                   | 4 (28.6)                         |
|                                                                                                      | Effective              |    | 6 (22.2)                    | 5 (35.7)                         |
|                                                                                                      | Slightly effective     |    | 5 (18.5)                    | 5 (35.7)                         |
|                                                                                                      | Not effective          |    | 1 (3.7)                     | 0                                |

\* number of participants answering the question, \*\* does not apply, \*\*\* after 12 (12 to 26) weeks n = 28 participants of control group started to get also OM treatment (waiting list design)

n = absolute number, OM = osteopathic medicine
